# Supplementary material
Source: PubMed Central journal article supplement (PMC4946453)
Supplement: txd-1-e44-s001.pdf [file txd-1-e44-s001.pdf]

**Table S1.** List of 117 differentially expressed microRNAs in airway epithelial cells of lung transplantation patients with acute cellular rejection (Q-value < 0.05).

| <b>microRNA</b>  | <b>Q-value</b> |
|------------------|----------------|
| hsa-miR-1205     | 0.0000         |
| hsa-miR-125a-3p  | 0.0000         |
| hsa-miR-149-3p   | 0.0000         |
| hsa-miR-1538     | 0.0000         |
| hsa-miR-1914-5p  | 0.0000         |
| hsa-miR-1972     | 0.0000         |
| hsa-miR-21-3p    | 0.0000         |
| hsa-miR-22-5p    | 0.0000         |
| hsa-miR-298      | 0.0000         |
| hsa-miR-34b-5p   | 0.0000         |
| hsa-miR-371a-5p  | 0.0000         |
| hsa-miR-431-5p   | 0.0000         |
| hsa-miR-490-3p   | 0.0000         |
| hsa-miR-514a-3p  | 0.0000         |
| hsa-miR-515-3p   | 0.0000         |
| hsa-miR-524-3p   | 0.0000         |
| hsa-miR-552-3p   | 0.0000         |
| hsa-miR-593-3p   | 0.0000         |
| hsa-miR-593-5p   | 0.0000         |
| hsa-miR-615-5p   | 0.0000         |
| hsa-miR-622      | 0.0000         |
| hsa-miR-659-3p   | 0.0000         |
| hsa-miR-665      | 0.0000         |
| hsa-miR-668-3p   | 0.0000         |
| hsa-miR-671-5p   | 0.0000         |
| hsa-miR-885-5p   | 0.0000         |
| hsa-miR-891b     | 0.0000         |
| hsa-miR-133a-3p  | 0.0124         |
| hsa-miR-202-3p   | 0.0124         |
| hsa-miR-224-5p   | 0.0124         |
| hsa-miR-30c-2-3p | 0.0124         |
| hsa-miR-520h     | 0.0124         |
| hsa-miR-302d-5p  | 0.0139         |
| hsa-miR-433      | 0.0142         |
| hsa-miR-506-3p   | 0.0142         |
| hsa-miR-128-3p   | 0.0150         |
| hsa-miR-1909-3p  | 0.0150         |
| hsa-miR-195-3p   | 0.0150         |
| hsa-miR-329-3p   | 0.0150         |

|                   |        |
|-------------------|--------|
| hsa-miR-34a-5p    | 0.0150 |
| hsa-miR-361-3p    | 0.0150 |
| hsa-miR-579-3p    | 0.0150 |
| hsa-miR-937-3p    | 0.0150 |
| hsa-miRPlus-A1027 | 0.0150 |
| hsa-miR-1200      | 0.0200 |
| hsa-miR-198       | 0.0200 |
| hsa-miR-526b-3p   | 0.0200 |
| hsa-miR-124-3p    | 0.0211 |
| hsa-miR-326       | 0.0211 |
| hsa-miR-432-3p    | 0.0211 |
| hsa-miR-516a-3p   | 0.0211 |
| hsa-miR-611       | 0.0211 |
| hsa-miR-646       | 0.0211 |
| hsa-miRPlus-C1066 | 0.0211 |
| hsa-miR-135b-3p   | 0.0242 |
| hsa-miR-10b-5p    | 0.0278 |
| hsa-miR-1203      | 0.0278 |
| hsa-miR-1254      | 0.0278 |
| hsa-miR-181a-3p   | 0.0278 |
| hsa-miR-564       | 0.0278 |
| hsa-let-7i-3p     | 0.0296 |
| hsa-miR-1236-3p   | 0.0296 |
| hsa-miR-1248      | 0.0296 |
| hsa-miR-1258      | 0.0296 |
| hsa-miR-1260a     | 0.0296 |
| hsa-miR-143-5p    | 0.0296 |
| hsa-miR-147b      | 0.0296 |
| hsa-miR-155-3p    | 0.0296 |
| hsa-miR-214-3p    | 0.0296 |
| hsa-miR-297       | 0.0296 |
| hsa-miR-30c-1-3p  | 0.0296 |
| hsa-miR-365a-3p   | 0.0296 |
| hsa-miR-373-5p    | 0.0296 |
| hsa-miR-410-3p    | 0.0296 |
| hsa-miR-496       | 0.0296 |
| hsa-miR-554       | 0.0296 |
| hsa-miR-623       | 0.0296 |
| hsa-miR-7-2-3p    | 0.0296 |
| hsa-miR-765       | 0.0296 |
| hsa-miR-1237-3p   | 0.0309 |
| hsa-miR-148a-3p   | 0.0309 |
| hsa-miR-331-5p    | 0.0309 |

|                   |        |
|-------------------|--------|
| hsa-miR-583       | 0.0309 |
| hsa-miR-216a-5p   | 0.0323 |
| hsa-miR-376a-5p   | 0.0323 |
| hsa-miR-486-3p    | 0.0323 |
| hsa-miR-504-5p    | 0.0323 |
| hsa-miR-658       | 0.0323 |
| hsa-miR-675-3p    | 0.0323 |
| hsa-miR-302a-3p   | 0.0345 |
| hsa-miR-551b-3p   | 0.0345 |
| hsa-miR-663b      | 0.0345 |
| hsa-miR-758-3p    | 0.0345 |
| hsa-miR-1471      | 0.0360 |
| hsa-miR-323a-5p   | 0.0360 |
| hsa-miR-602       | 0.0360 |
| hsa-miR-382-5p    | 0.0387 |
| hsa-miR-429       | 0.0387 |
| hsa-miR-517-5p    | 0.0395 |
| hsa-miR-216b-5p   | 0.0399 |
| hsa-miR-640       | 0.0410 |
| hsa-miRPlus-C1076 | 0.0410 |
| hsa-miR-1227-3p   | 0.0418 |
| hsa-miR-147a      | 0.0418 |
| hsa-miR-518d-5p   | 0.0418 |
| hsa-miR-596       | 0.0418 |
| hsa-miR-649       | 0.0418 |
| hsa-miR-877-5p    | 0.0418 |
| hsa-miR-518d-3p   | 0.0442 |
| hsa-miR-558       | 0.0442 |
| hsa-miR-182-3p    | 0.0449 |
| hsa-miR-296-3p    | 0.0453 |
| hsa-miR-487a      | 0.0453 |
| hsa-miR-127-5p    | 0.0474 |
| hsa-miR-148b-3p   | 0.0474 |
| hsa-miR-518c-5p   | 0.0474 |
| hsa-miR-642a-5p   | 0.0474 |
