# Supplementary material
Source: PubMed Central journal article supplement (PMC4946453)
Supplement: txd-1-e44-s002.pdf [file txd-1-e44-s002.pdf]

**Table S2.** List of 40 differentially expressed microRNAs (Q-value < 0.05) in acute cellular rejection with their experimentally validated targets.

| <b>microRNA</b>   | <b>Target Gene</b> |
|-------------------|--------------------|
| 1. hsa-miR-10b-5p | BCL2L11            |
|                   | CDK2               |
|                   | CDKN1A             |
|                   | CDKN2A             |
|                   | CSNK2A1            |
|                   | HOXD10             |
|                   | KLF4               |
|                   | LAMC1              |
|                   | MAPRE1             |
|                   | NCOR2              |
|                   | NF1                |
|                   | NOTCH1             |
|                   | NR4A3              |
|                   | NRP2               |
|                   | PAX6               |
|                   | PIEZO1             |
|                   | PPARA              |
|                   | SDC1               |
|                   | SRSF1              |
|                   | TFAP2C             |
| TP53              |                    |
| TRA2B             |                    |
| 2. hsa-miR-124-3p | ADIPOR2            |
|                   | AHR                |
|                   | AR                 |
|                   | BACE1              |
|                   | CCL2               |
|                   | CDK2               |
|                   | CDK4               |
|                   | CDK6               |
|                   | CDKN2A             |
|                   | CEBPA              |
|                   | COL1A1             |
|                   | CTDSP1             |
|                   | E2F6               |
|                   | EFNB1              |
|                   | ELK3               |
|                   | EYA4               |
|                   | EZH2               |

FXN  
HCN2  
HMGA1  
IL6  
IL6R  
IQGAP1  
IRAK3  
ITGB1  
KLF4  
LAMC1  
MAP2K3  
MECP2  
MSN  
MTPN  
NFKBIZ  
NR3C1  
NR4A3  
PEA15  
PNP  
PPARA  
PRPS1  
QKI  
RASSF2  
RDH10  
RELA  
ROCK2  
SHC1  
SIRT1  
SLC16A1  
SMYD3  
SNAI2  
SP1  
SULF1  
VIM  
VKORC1

---

|    |              |      |
|----|--------------|------|
| 3. | hsa-miR-1258 | HPSE |
|----|--------------|------|

---

|    |                |                                                        |
|----|----------------|--------------------------------------------------------|
| 4. | hsa-miR-128-3p | BMI1<br>CTDSP1<br>DCX<br>E2F3<br>EGFR<br>EYA4<br>FBXW7 |
|----|----------------|--------------------------------------------------------|

KLF4  
MAP2K1  
NTRK3  
POU5F1  
RELN  
RPS6KA5  
SIRT1  
SLC16A1  
SOX2  
TGFB1

---

5. hsa-miR-133a-3p

BCL2L1  
CACNA1C  
CASP9  
COL1A1  
EGFL7  
EGFR  
FSCN1  
GSTP1  
HCN2  
HCN4  
KCNH2  
KCNQ1  
KRT7  
LASP1  
MCL1  
MSN  
PIK3R2  
PKM  
PNP  
PRDM16  
RGS3  
SP1  
TAGLN2  
VEGFA  
VKORC1

---

6. hsa-miR-147a

ACVR1C  
VEGFA

---

7. hsa-miR-148a-3p

ACVR1  
BCL2  
CCKBR  
CDC25B  
DNMT1  
DNMT3B

|     |                 |         |
|-----|-----------------|---------|
|     |                 | HLA-G   |
|     |                 | IRS1    |
|     |                 | NR1I2   |
|     |                 | RPS6KA5 |
|     |                 | TGIF2   |
|     |                 | TMED7   |
| 8.  | hsa-miR-148b-3p | CCKBR   |
|     |                 | CSF1    |
|     |                 | EYA4    |
|     |                 | HLA-G   |
|     |                 | ITGA5   |
|     |                 | MECP2   |
|     |                 | NR3C2   |
|     |                 | NRAS    |
|     |                 | PIK3CA  |
|     |                 | ROCK1   |
|     |                 | SNAI2   |
| 9.  | hsa-miR-149-3p  | AKT1    |
|     |                 | E2F1    |
|     |                 | MYBL2   |
|     |                 | TGIF2   |
| 10. | hsa-miR-155-3p  | IRAK3   |
| 11. | hsa-miR-181a-3p | NANOG   |
| 12. | hsa-miR-198     | CCNT1   |
|     |                 | MYB     |
|     |                 | NTRK3   |
| 13. | hsa-miR-202-3p  | MYCN    |
| 14. | hsa-miR-214-3p  | ASF1B   |
|     |                 | ATF4    |
|     |                 | BCL2L2  |
|     |                 | CTNNB1  |
|     |                 | MAP2K3  |
|     |                 | MAPK8   |
|     |                 | PLXNB1  |
|     |                 | POU4F2  |
|     |                 | PSMD10  |
|     |                 | PTEN    |
|     |                 | QKI     |
|     |                 | SRGAP1  |
|     |                 | SRGAP2  |
|     |                 | TP53    |
|     |                 | TWIST1  |

|     |                  |                                                                                                      |
|-----|------------------|------------------------------------------------------------------------------------------------------|
|     |                  | XBP1                                                                                                 |
| 15. | hsa-miR-216a-5p  | CD44<br>CDC42<br>PTEN<br>SIRT1<br>SMAD7<br>CSNK2A1                                                   |
| 16. | hsa-miR-216b-5p  | CSNK2A1                                                                                              |
| 17. | hsa-miR-224-5p   | AP2M1<br>API5<br>CDC42<br>CXCR4<br>EDNRA<br>EYA4<br>FOSB<br>KLK10<br>NCOA6<br>NIT1<br>PEBP1<br>SMAD4 |
| 18. | hsa-miR-296-3p   | CDC25B<br>CDKN2A<br>HMGA1<br>KCNH1<br>LGALS3BP<br>PIK3R2<br>PKM<br>SPI1                              |
| 19. | hsa-miR-298      | BACE1<br>CDKN1A                                                                                      |
| 20. | hsa-miR-302a-3p  | AKT1<br>CCND1<br>CDKN1A<br>DAZAP2<br>LEFTY1<br>LEFTY2<br>NR2F2<br>SLAIN1<br>TAC1<br>TOB2             |
| 21. | hsa-miR-30c-1-3p | HMBOX1                                                                                               |
| 22. | hsa-miR-326      | CD9                                                                                                  |

GLI1  
MSH3  
NOTCH1  
NOTCH2  
PKM  
SMO  
VKORC1

---

23. hsa-miR-34a-5p

ACSL1  
ACSL4  
AP2M1  
AXIN2  
AXL  
BCL2  
BMP7  
CCL22  
CCND1  
CCND3  
CCNE2  
CD44  
CDC25A  
CDK4  
CDK6  
CDKN2A  
CDKN2C  
CEBPB  
CTNNB1  
DLL1  
E2F1  
E2F3  
EFNB1  
EPHA5  
FOSL1  
FOXP1  
GRM7  
HDAC1  
HNF4A  
IFNB1  
IMPA1  
IMPDH2  
JAG1  
KLB  
LDHA  
LEF1

MAGEA12  
MAGEA2  
MAGEA3  
MAGEA6  
MAP2K1  
MAP3K9  
MCM5  
MET  
MTA2  
MYB  
MYC  
MYCN  
NANOG  
NOTCH1  
NOTCH2  
PDGFRA  
PEA15  
PPP1R10  
SEPT7  
SIRT1  
SOX2  
SPI1  
STX1A  
SYT1  
TP53  
ULBP2  
VAMP2  
VEGFA  
WNT1  
YY1  
ZAP70

---

24. hsa-miR-34b-5p

BCL2  
CCNE2  
CDK4  
CREB1  
HNF4A  
MET  
MYB  
MYC

---

25. hsa-miR-365a-3p

BCL2  
CCND1  
IL6  
IMPA1

|     |                 |                                                                                                                                                                                                                |
|-----|-----------------|----------------------------------------------------------------------------------------------------------------------------------------------------------------------------------------------------------------|
|     |                 | MTA2                                                                                                                                                                                                           |
| 26. | hsa-miR-376a-5p | ACVR1C<br>PRPS1<br>SLC16A1<br>SNX19<br>SRSF11<br>TTK<br>ZNF513                                                                                                                                                 |
| 27. | hsa-miR-429     | BAP1<br>BCL2<br>ELMO2<br>ERBB2IP<br>HOXB5<br>KLF11<br>KLHL20<br>MYC<br>OSTF1<br>PTPRD<br>RASSF2<br>RERE<br>RIN2<br>SEPT7<br>SHC1<br>SOX2<br>TCF7L1<br>VAC14<br>WASF3<br>WDR37<br>XIAP<br>ZEB1<br>ZEB2<br>ZFPM2 |
| 28. | hsa-miR-490-3p  | ERGIC3                                                                                                                                                                                                         |
| 29. | hsa-miR-504-5p  | DRD1<br>MDM2<br>TCEAL1<br>TP53<br>VEGFA                                                                                                                                                                        |
| 30. | hsa-miR-506-3p  | FXN                                                                                                                                                                                                            |
| 31. | hsa-miR-515-3p  | CDKN1A                                                                                                                                                                                                         |
| 32. | hsa-miR-516a-3p | SULF1                                                                                                                                                                                                          |
| 33. | hsa-miR-520h    | ABCG2                                                                                                                                                                                                          |



VEGFA

|     |                 |          |
|-----|-----------------|----------|
| 34. | hsa-miR-596     | LGALS3BP |
| 35. | hsa-miR-615-5p  | IGF2     |
| 36. | hsa-miR-622     | KRAS     |
| 37. | hsa-miR-642a-5p | DOHH     |
| 38. | hsa-miR-659-3p  | GRN      |
| 39. | hsa-miR-765     | HNF4A    |
|     |                 | NTRK3    |
| 40. | hsa-miR-885-5p  | CDK2     |
|     |                 | MCM5     |
