# Supplementary material
Source: PubMed Central journal article supplement (PMC4946453)
Supplement: txd-1-e44-s003.pdf [file txd-1-e44-s003.pdf]

**Table S3.** Comprehensive list of enriched functional categories based 253 experimentally verified gene targets of differentially expressed microRNAs in ACR. Enrichment *P*-values were adjusted for multiple hypothesis testing using Benjamini-Hochberg method (adjusted *P*-value cutoff < 0.01).

| Database      | Functional term                                                                 | Adjusted P-value |
|---------------|---------------------------------------------------------------------------------|------------------|
| GOTERM_BP_ALL | GO:0042127~regulation of cell proliferation                                     | 4.86E-27         |
| GOTERM_BP_ALL | GO:0009893~positive regulation of metabolic process                             | 3.20E-23         |
| GOTERM_BP_ALL | GO:0048856~anatomical structure development                                     | 1.14E-22         |
| GOTERM_BP_ALL | GO:0048513~organ development                                                    | 1.59E-22         |
| GOTERM_BP_ALL | GO:0019222~regulation of metabolic process                                      | 1.95E-22         |
| KEGG_PATHWAY  | hsa05200:Pathways in cancer                                                     | 2.64E-22         |
| GOTERM_BP_ALL | GO:0032502~developmental process                                                | 7.35E-22         |
| GOTERM_BP_ALL | GO:0008284~positive regulation of cell proliferation                            | 1.56E-21         |
| GOTERM_BP_ALL | GO:0048731~system development                                                   | 6.53E-21         |
| KEGG_PATHWAY  | hsa05215:Prostate cancer                                                        | 1.57E-20         |
| GOTERM_BP_ALL | GO:0007275~multicellular organismal development                                 | 2.91E-20         |
| GOTERM_BP_ALL | GO:0048869~cellular developmental process                                       | 4.60E-20         |
| GOTERM_BP_ALL | GO:0030154~cell differentiation                                                 | 5.71E-20         |
| GOTERM_BP_ALL | GO:0045595~regulation of cell differentiation                                   | 1.38E-19         |
| GOTERM_BP_ALL | GO:0006357~regulation of transcription from RNA polymerase II promoter          | 6.77E-19         |
| GOTERM_BP_ALL | GO:0050793~regulation of developmental process                                  | 4.36E-18         |
| GOTERM_BP_ALL | GO:0010628~positive regulation of gene expression                               | 1.19E-17         |
| GOTERM_BP_ALL | GO:0051254~positive regulation of RNA metabolic process                         | 9.30E-17         |
| GOTERM_BP_ALL | GO:0010468~regulation of gene expression                                        | 9.37E-17         |
| GOTERM_MF_ALL | GO:0043565~sequence-specific DNA binding                                        | 1.41E-16         |
| KEGG_PATHWAY  | hsa05220:Chronic myeloid leukemia                                               | 2.45E-16         |
| GOTERM_BP_ALL | GO:0045941~positive regulation of transcription                                 | 7.04E-16         |
| GOTERM_BP_ALL | GO:0009790~embryonic development                                                | 8.93E-16         |
| GOTERM_MF_ALL | GO:0003700~transcription factor activity                                        | 1.22E-15         |
| KEGG_PATHWAY  | hsa05212:Pancreatic cancer                                                      | 1.26E-15         |
| GOTERM_BP_ALL | GO:0022008~neurogenesis                                                         | 5.77E-15         |
| GOTERM_BP_ALL | GO:0051252~regulation of RNA metabolic process                                  | 6.00E-15         |
| KEGG_PATHWAY  | hsa05210:Colorectal cancer                                                      | 3.42E-14         |
| GOTERM_BP_ALL | GO:0045944~positive regulation of transcription from RNA polymerase II promoter | 7.06E-14         |
| GOTERM_BP_ALL | GO:0042221~response to chemical stimulus                                        | 8.53E-14         |
| GOTERM_BP_ALL | GO:0009887~organ morphogenesis                                                  | 1.13E-13         |
| KEGG_PATHWAY  | hsa05214:Glioma                                                                 | 2.71E-13         |
| GOTERM_BP_ALL | GO:0010646~regulation of cell communication                                     | 4.28E-13         |
| GOTERM_BP_ALL | GO:0045449~regulation of transcription                                          | 5.17E-13         |
| GOTERM_BP_ALL | GO:0007399~nervous system development                                           | 7.28E-13         |
| GOTERM_BP_ALL | GO:0048699~generation of neurons                                                | 2.01E-12         |
| KEGG_PATHWAY  | hsa05218:Melanoma                                                               | 2.32E-12         |
| GOTERM_BP_ALL | GO:0051338~regulation of transferase activity                                   | 2.50E-12         |
| KEGG_PATHWAY  | hsa05222:Small cell lung cancer                                                 | 3.87E-12         |
| GOTERM_BP_ALL | GO:0043549~regulation of kinase activity                                        | 4.91E-12         |
| GOTERM_BP_ALL | GO:0000122~negative regulation of transcription from RNA polymerase II promoter | 6.85E-12         |
| GOTERM_BP_ALL | GO:0009725~response to hormone stimulus                                         | 9.62E-12         |
| GOTERM_BP_ALL | GO:0016477~cell migration                                                       | 1.55E-11         |
| KEGG_PATHWAY  | hsa05219:Bladder cancer                                                         | 1.67E-11         |
| GOTERM_BP_ALL | GO:0009888~tissue development                                                   | 1.80E-11         |
| KEGG_PATHWAY  | hsa05213:Endometrial cancer                                                     | 2.50E-11         |
| GOTERM_BP_ALL | GO:0051726~regulation of cell cycle                                             | 2.53E-11         |
| GOTERM_BP_ALL | GO:0042981~regulation of apoptosis                                              | 2.61E-11         |
| GOTERM_BP_ALL | GO:0009966~regulation of signal transduction                                    | 3.30E-11         |
| GOTERM_BP_ALL | GO:0043067~regulation of programmed cell death                                  | 3.55E-11         |
| GOTERM_BP_ALL | GO:0010941~regulation of cell death                                             | 3.98E-11         |
| GOTERM_BP_ALL | GO:0045859~regulation of protein kinase activity                                | 6.48E-11         |
| GOTERM_BP_ALL | GO:0008361~regulation of cell size                                              | 7.65E-11         |
| GOTERM_BP_ALL | GO:0045597~positive regulation of cell differentiation                          | 8.57E-11         |
| GOTERM_BP_ALL | GO:0048870~cell motility                                                        | 1.54E-10         |

|               |                                                                   |          |
|---------------|-------------------------------------------------------------------|----------|
| GOTERM_BP_ALL | GO:0006928~cell motion                                            | 2.25E-10 |
| GOTERM_BP_ALL | GO:0050896~response to stimulus                                   | 2.51E-10 |
| GOTERM_BP_ALL | GO:0045165~cell fate commitment                                   | 2.91E-10 |
| GOTERM_BP_ALL | GO:0050790~regulation of catalytic activity                       | 4.86E-10 |
| KEGG_PATHWAY  | hsa05223:Non-small cell lung cancer                               | 6.38E-10 |
| GOTERM_BP_ALL | GO:0051094~positive regulation of developmental process           | 6.46E-10 |
| GOTERM_BP_ALL | GO:0030334~regulation of cell migration                           | 8.95E-10 |
| GOTERM_BP_ALL | GO:0040012~regulation of locomotion                               | 1.08E-09 |
| GOTERM_CC_ALL | GO:0005654~nucleoplasm                                            | 1.11E-09 |
| GOTERM_BP_ALL | GO:0051270~regulation of cell motion                              | 1.18E-09 |
| GOTERM_BP_ALL | GO:0035295~tube development                                       | 1.79E-09 |
| GOTERM_CC_ALL | GO:0005667~transcription factor complex                           | 2.14E-09 |
| GOTERM_BP_ALL | GO:0010647~positive regulation of cell communication              | 3.52E-09 |
| KEGG_PATHWAY  | hsa04110:Cell cycle                                               | 4.21E-09 |
| GOTERM_MF_ALL | GO:0046983~protein dimerization activity                          | 4.85E-09 |
| GOTERM_BP_ALL | GO:0007417~central nervous system development                     | 7.07E-09 |
| GOTERM_BP_ALL | GO:0040011~locomotion                                             | 9.48E-09 |
| GOTERM_BP_ALL | GO:0030182~neuron differentiation                                 | 1.34E-08 |
| GOTERM_BP_ALL | GO:0009314~response to radiation                                  | 1.43E-08 |
| KEGG_PATHWAY  | hsa04510:Focal adhesion                                           | 1.65E-08 |
| GOTERM_BP_ALL | GO:0001568~blood vessel development                               | 6.83E-08 |
| GOTERM_BP_ALL | GO:0003002~regionalization                                        | 7.22E-08 |
| GOTERM_CC_ALL | GO:0043229~intracellular organelle                                | 9.48E-08 |
| GOTERM_BP_ALL | GO:0001944~vasculature development                                | 1.02E-07 |
| GOTERM_BP_ALL | GO:0006950~response to stress                                     | 1.29E-07 |
| GOTERM_BP_ALL | GO:0022414~reproductive process                                   | 1.44E-07 |
| GOTERM_BP_ALL | GO:0033674~positive regulation of kinase activity                 | 1.46E-07 |
| GOTERM_BP_ALL | GO:0014031~mesenchymal cell development                           | 1.50E-07 |
| GOTERM_BP_ALL | GO:0048762~mesenchymal cell differentiation                       | 1.50E-07 |
| GOTERM_BP_ALL | GO:0060485~mesenchyme development                                 | 1.79E-07 |
| GOTERM_BP_ALL | GO:0009611~response to wounding                                   | 1.96E-07 |
| GOTERM_BP_ALL | GO:0007420~brain development                                      | 2.01E-07 |
| KEGG_PATHWAY  | hsa05221:Acute myeloid leukemia                                   | 2.02E-07 |
| GOTERM_MF_ALL | GO:0004672~protein kinase activity                                | 2.45E-07 |
| GOTERM_MF_ALL | GO:0003677~DNA binding                                            | 2.46E-07 |
| GOTERM_MF_ALL | GO:0016563~transcription activator activity                       | 2.54E-07 |
| GOTERM_MF_ALL | GO:0016301~kinase activity                                        | 2.54E-07 |
| GOTERM_BP_ALL | GO:0000079~regulation of cyclin-dependent protein kinase activity | 2.58E-07 |
| GOTERM_MF_ALL | GO:0008134~transcription factor binding                           | 2.69E-07 |
| GOTERM_BP_ALL | GO:0009967~positive regulation of signal transduction             | 2.82E-07 |
| GOTERM_BP_ALL | GO:0048545~response to steroid hormone stimulus                   | 2.88E-07 |
| GOTERM_BP_ALL | GO:0035239~tube morphogenesis                                     | 3.44E-07 |
| GOTERM_CC_ALL | GO:0042995~cell projection                                        | 4.40E-07 |
| GOTERM_BP_ALL | GO:0008285~negative regulation of cell proliferation              | 4.40E-07 |
| GOTERM_BP_ALL | GO:0002376~immune system process                                  | 5.58E-07 |
| GOTERM_BP_ALL | GO:0048729~tissue morphogenesis                                   | 6.98E-07 |
| GOTERM_MF_ALL | GO:0016773~phosphotransferase activity, alcohol group as acceptor | 6.99E-07 |
| GOTERM_BP_ALL | GO:0048732~gland development                                      | 7.20E-07 |
| GOTERM_BP_ALL | GO:0060284~regulation of cell development                         | 7.20E-07 |
| GOTERM_BP_ALL | GO:0001709~cell fate determination                                | 7.32E-07 |
| KEGG_PATHWAY  | hsa04722:Neurotrophin signaling pathway                           | 9.67E-07 |
| GOTERM_BP_ALL | GO:0051272~positive regulation of cell motion                     | 1.02E-06 |
| GOTERM_BP_ALL | GO:0048514~blood vessel morphogenesis                             | 1.04E-06 |
| GOTERM_BP_ALL | GO:0009952~anterior/posterior pattern formation                   | 1.07E-06 |
| GOTERM_BP_ALL | GO:0048754~branching morphogenesis of a tube                      | 1.40E-06 |
| GOTERM_BP_ALL | GO:0007049~cell cycle                                             | 1.95E-06 |
| GOTERM_BP_ALL | GO:0031960~response to corticosteroid stimulus                    | 1.96E-06 |
| GOTERM_BP_ALL | GO:0002520~immune system development                              | 2.01E-06 |
| GOTERM_BP_ALL | GO:0045860~positive regulation of protein kinase activity         | 2.20E-06 |
| GOTERM_BP_ALL | GO:0048598~embryonic morphogenesis                                | 2.26E-06 |
| GOTERM_BP_ALL | GO:0031099~regeneration                                           | 2.41E-06 |
| GOTERM_BP_ALL | GO:0006915~apoptosis                                              | 2.47E-06 |
| GOTERM_BP_ALL | GO:0008283~cell proliferation                                     | 2.84E-06 |
| GOTERM_BP_ALL | GO:0030335~positive regulation of cell migration                  | 2.99E-06 |

|                  |                                                                                 |          |
|------------------|---------------------------------------------------------------------------------|----------|
| GOTERM_BP_ALL    | GO:0008219~cell death                                                           | 3.18E-06 |
| GOTERM_BP_ALL    | GO:0043434~response to peptide hormone stimulus                                 | 3.20E-06 |
| GOTERM_BP_ALL    | GO:0012501~programmed cell death                                                | 3.29E-06 |
| GOTERM_BP_ALL    | GO:0048534~hemopoietic or lymphoid organ development                            | 3.73E-06 |
| KEGG_PATHWAY     | hsa05216:Thyroid cancer                                                         | 3.92E-06 |
| KEGG_PATHWAY     | hsa04520:Adherens junction                                                      | 4.43E-06 |
| GOTERM_BP_ALL    | GO:0001763~morphogenesis of a branching structure                               | 4.47E-06 |
| KEGG_PATHWAY     | hsa04115:p53 signaling pathway                                                  | 8.52E-06 |
| GOTERM_BP_ALL    | GO:0010648~negative regulation of cell communication                            | 8.94E-06 |
| GOTERM_BP_ALL    | GO:0045937~positive regulation of phosphate metabolic process                   | 9.23E-06 |
| GOTERM_BP_ALL    | GO:0010562~positive regulation of phosphorus metabolic process                  | 9.23E-06 |
| GOTERM_BP_ALL    | GO:0000278~mitotic cell cycle                                                   | 9.63E-06 |
| GOTERM_BP_ALL    | GO:0060541~respiratory system development                                       | 1.88E-05 |
| GOTERM_BP_ALL    | GO:0030097~hemopoiesis                                                          | 2.07E-05 |
| GOTERM_MF_ALL    | GO:0003702~RNA polymerase II transcription factor activity                      | 3.60E-05 |
| GOTERM_BP_ALL    | GO:0048666~neuron development                                                   | 3.61E-05 |
| GOTERM_BP_ALL    | GO:0010551~regulation of specific transcription from RNA polymerase II promoter | 3.61E-05 |
| GOTERM_BP_ALL    | GO:0051960~regulation of nervous system development                             | 3.82E-05 |
| GOTERM_BP_ALL    | GO:0050767~regulation of neurogenesis                                           | 3.91E-05 |
| GOTERM_MF_ALL    | GO:0016564~transcription repressor activity                                     | 5.21E-05 |
| GOTERM_MF_ALL    | GO:0003705~RNA polymerase II transcription factor activity, enhancer binding    | 5.47E-05 |
| GOTERM_BP_ALL    | GO:0031175~neuron projection development                                        | 5.51E-05 |
| GOTERM_BP_ALL    | GO:0048663~neuron fate commitment                                               | 5.52E-05 |
| GOTERM_BP_ALL    | GO:0030324~lung development                                                     | 5.64E-05 |
| GOTERM_BP_ALL    | GO:0060348~bone development                                                     | 6.14E-05 |
| GOTERM_BP_ALL    | GO:0000902~cell morphogenesis                                                   | 6.90E-05 |
| GOTERM_BP_ALL    | GO:0016049~cell growth                                                          | 7.04E-05 |
| GOTERM_BP_ALL    | GO:0030323~respiratory tube development                                         | 7.10E-05 |
| REACTOME_PATHWAY | REACT_11061:Signalling by NGF                                                   | 9.24E-05 |
| KEGG_PATHWAY     | hsa04350:TGF-beta signaling pathway                                             | 9.55E-05 |
| GOTERM_BP_ALL    | GO:0010942~positive regulation of cell death                                    | 1.00E-04 |
| GOTERM_BP_ALL    | GO:0007507~heart development                                                    | 1.25E-04 |
| GOTERM_BP_ALL    | GO:0043193~positive regulation of gene-specific transcription                   | 1.26E-04 |
| GOTERM_BP_ALL    | GO:0006873~cellular ion homeostasis                                             | 1.29E-04 |
| GOTERM_BP_ALL    | GO:0001655~urogenital system development                                        | 1.30E-04 |
| GOTERM_BP_ALL    | GO:0042493~response to drug                                                     | 1.30E-04 |
| GOTERM_BP_ALL    | GO:0042060~wound healing                                                        | 1.54E-04 |
| GOTERM_BP_ALL    | GO:0055082~cellular chemical homeostasis                                        | 1.54E-04 |
| GOTERM_BP_ALL    | GO:0007154~cell communication                                                   | 1.55E-04 |
| GOTERM_BP_ALL    | GO:0010720~positive regulation of cell development                              | 1.59E-04 |
| GOTERM_BP_ALL    | GO:0050678~regulation of epithelial cell proliferation                          | 1.93E-04 |
| GOTERM_BP_ALL    | GO:0070482~response to oxygen levels                                            | 1.93E-04 |
| GOTERM_BP_ALL    | GO:0043405~regulation of MAP kinase activity                                    | 1.93E-04 |
| GOTERM_BP_ALL    | GO:0001775~cell activation                                                      | 1.93E-04 |
| KEGG_PATHWAY     | hsa04310:Wnt signaling pathway                                                  | 2.22E-04 |
| GOTERM_BP_ALL    | GO:0007398~ectoderm development                                                 | 2.29E-04 |
| GOTERM_BP_ALL    | GO:0051301~cell division                                                        | 2.66E-04 |
| GOTERM_BP_ALL    | GO:0042692~muscle cell differentiation                                          | 2.75E-04 |
| GOTERM_BP_ALL    | GO:0045767~regulation of anti-apoptosis                                         | 3.03E-04 |
| GOTERM_BP_ALL    | GO:0010467~gene expression                                                      | 3.45E-04 |
| GOTERM_BP_ALL    | GO:0007243~protein kinase cascade                                               | 3.51E-04 |
| GOTERM_BP_ALL    | GO:0048812~neuron projection morphogenesis                                      | 4.40E-04 |
| GOTERM_BP_ALL    | GO:0008544~epidermis development                                                | 4.53E-04 |
| KEGG_PATHWAY     | hsa04012:ErbB signaling pathway                                                 | 4.65E-04 |
| GOTERM_BP_ALL    | GO:0031100~organ regeneration                                                   | 5.05E-04 |
| GOTERM_BP_ALL    | GO:0001952~regulation of cell-matrix adhesion                                   | 6.01E-04 |
| GOTERM_BP_ALL    | GO:0060429~epithelium development                                               | 8.01E-04 |
| BIOCARTA         | h_cellcyclePathway:Cyclins and Cell Cycle Regulation                            | 8.03E-04 |
| KEGG_PATHWAY     | hsa04010:MAPK signaling pathway                                                 | 1.10E-03 |
| GOTERM_BP_ALL    | GO:0008637~apoptotic mitochondrial changes                                      | 1.14E-03 |
| GOTERM_BP_ALL    | GO:0060393~regulation of pathway-restricted SMAD protein phosphorylation        | 1.19E-03 |
| GOTERM_BP_ALL    | GO:0051057~positive regulation of small GTPase mediated signal transduction     | 1.19E-03 |
| GOTERM_MF_ALL    | GO:0046332~SMAD binding                                                         | 1.22E-03 |
| REACTOME_PATHWAY | REACT_498:Signaling by Insulin receptor                                         | 1.30E-03 |

|               |                                                                          |          |
|---------------|--------------------------------------------------------------------------|----------|
| GOTERM_BP_ALL | GO:0016202~regulation of striated muscle tissue development              | 1.31E-03 |
| GOTERM_BP_ALL | GO:0001525~angiogenesis                                                  | 1.32E-03 |
| GOTERM_BP_ALL | GO:0001822~kidney development                                            | 1.43E-03 |
| GOTERM_BP_ALL | GO:0014033~neural crest cell differentiation                             | 1.50E-03 |
| GOTERM_BP_ALL | GO:0014032~neural crest cell development                                 | 1.50E-03 |
| GOTERM_BP_ALL | GO:0007569~cell aging                                                    | 1.50E-03 |
| GOTERM_BP_ALL | GO:0000904~cell morphogenesis involved in differentiation                | 1.54E-03 |
| GOTERM_BP_ALL | GO:0051240~positive regulation of multicellular organismal process       | 1.54E-03 |
| GOTERM_MF_ALL | GO:0003682~chromatin binding                                             | 1.72E-03 |
| GOTERM_MF_ALL | GO:0016538~cyclin-dependent protein kinase regulator activity            | 1.72E-03 |
| GOTERM_BP_ALL | GO:0045792~negative regulation of cell size                              | 1.73E-03 |
| GOTERM_BP_ALL | GO:0001889~liver development                                             | 1.73E-03 |
| GOTERM_BP_ALL | GO:0010001~glial cell differentiation                                    | 1.73E-03 |
| GOTERM_BP_ALL | GO:0007165~signal transduction                                           | 1.74E-03 |
| GOTERM_BP_ALL | GO:0000165~MAPKKK cascade                                                | 1.76E-03 |
| KEGG_PATHWAY  | hsa04210:Apoptosis                                                       | 2.07E-03 |
| BIOCARTA      | h_p53Pathway:p53 Signaling Pathway                                       | 2.15E-03 |
| GOTERM_BP_ALL | GO:0034330~cell junction organization                                    | 2.47E-03 |
| GOTERM_BP_ALL | GO:0045927~positive regulation of growth                                 | 2.50E-03 |
| BIOCARTA      | h_RacCycDPathway:Influence of Ras and Rho proteins on G1 to S Transition | 2.55E-03 |
| GOTERM_BP_ALL | GO:0001569~patterning of blood vessels                                   | 2.56E-03 |
| GOTERM_BP_ALL | GO:0001666~response to hypoxia                                           | 2.66E-03 |
| KEGG_PATHWAY  | hsa04370:VEGF signaling pathway                                          | 3.12E-03 |
| GOTERM_BP_ALL | GO:0007179~transforming growth factor beta receptor signaling pathway    | 3.14E-03 |
| GOTERM_BP_ALL | GO:0046649~lymphocyte activation                                         | 3.15E-03 |
| GOTERM_BP_ALL | GO:0070663~regulation of leukocyte proliferation                         | 3.20E-03 |
| GOTERM_BP_ALL | GO:0032944~regulation of mononuclear cell proliferation                  | 3.20E-03 |
| GOTERM_BP_ALL | GO:0006952~defense response                                              | 3.37E-03 |
| GOTERM_BP_ALL | GO:0040014~regulation of multicellular organism growth                   | 3.37E-03 |
| GOTERM_BP_ALL | GO:0046651~lymphocyte proliferation                                      | 4.09E-03 |
| GOTERM_BP_ALL | GO:0051591~response to cAMP                                              | 4.09E-03 |
| GOTERM_BP_ALL | GO:0001764~neuron migration                                              | 4.26E-03 |
| GOTERM_BP_ALL | GO:0045321~leukocyte activation                                          | 4.50E-03 |
| GOTERM_BP_ALL | GO:0070661~leukocyte proliferation                                       | 5.00E-03 |
| GOTERM_BP_ALL | GO:0042306~regulation of protein import into nucleus                     | 5.00E-03 |
| GOTERM_BP_ALL | GO:0032943~mononuclear cell proliferation                                | 5.00E-03 |
| KEGG_PATHWAY  | hsa04620:Toll-like receptor signaling pathway                            | 5.10E-03 |
| KEGG_PATHWAY  | hsa04062:Chemokine signaling pathway                                     | 5.12E-03 |
| GOTERM_BP_ALL | GO:0006954~inflammatory response                                         | 6.24E-03 |
| GOTERM_BP_ALL | GO:0002521~leukocyte differentiation                                     | 9.03E-03 |
| GOTERM_BP_ALL | GO:0006325~chromatin organization                                        | 9.05E-03 |
